# Supplementary material
Source: PubMed Central journal article supplement (PMC7850174)
Supplement: supp_8.2.E437_2019-0190-1-at.pdf [file supp_8.2.E437_2019-0190-1-at.pdf]

**Appendix 1: Supplemental tables**

**Supplemental Table S1a: CPT codes used to identify cardiac catheterization procedures, US:**

| CPT code                    | Description                                                                                                                                                                                                                                                                                                                                                                                                                  |
|-----------------------------|------------------------------------------------------------------------------------------------------------------------------------------------------------------------------------------------------------------------------------------------------------------------------------------------------------------------------------------------------------------------------------------------------------------------------|
| Procedure years before 2011 |                                                                                                                                                                                                                                                                                                                                                                                                                              |
| 93508                       | Coronary Angiogram                                                                                                                                                                                                                                                                                                                                                                                                           |
| 93510                       | Left Heart Catheterization                                                                                                                                                                                                                                                                                                                                                                                                   |
| 93543                       | LV Injection                                                                                                                                                                                                                                                                                                                                                                                                                 |
| 93555                       | Supervision & Interpretation for LV angio                                                                                                                                                                                                                                                                                                                                                                                    |
| 93526                       | RLHC                                                                                                                                                                                                                                                                                                                                                                                                                         |
| 93545                       | Coronary Injection                                                                                                                                                                                                                                                                                                                                                                                                           |
| 93556                       | S&I Cor Ing                                                                                                                                                                                                                                                                                                                                                                                                                  |
| 93539                       | Injection Arterial Conduits                                                                                                                                                                                                                                                                                                                                                                                                  |
| 93540                       | Injection SVG's                                                                                                                                                                                                                                                                                                                                                                                                              |
| Procedure years after 2011  |                                                                                                                                                                                                                                                                                                                                                                                                                              |
| 93452                       | Left heart catheterization including intraprocedural injection(s) for left ventriculography; imaging supervision and interpretation, when performed                                                                                                                                                                                                                                                                          |
| 93453                       | Combined right heart cath and left heart catheterization including intraprocedural injection(s) for left ventriculography, imaging supervision and interpretation, when performed                                                                                                                                                                                                                                            |
| 93454                       | Catheter placement in coronary artery(s) for coronary angiography, including intraprocedural injection(s) for coronary angiography, imaging supervision and interpretation                                                                                                                                                                                                                                                   |
| 93455                       | Catheter placement in coronary artery(s) for coronary angiography, including intraprocedural injection(s) for coronary angiography, imaging supervision and interpretation; with catheter placement(s) in bypass graft(s) (internal mammary, free arterial venous grafts) including intraprocedural injection(s) for bypass graft angiography                                                                                |
| 93456                       | Catheter placement in coronary artery(s) for coronary angiography, including intraprocedural injection(s) for coronary angiography, imaging supervision and interpretation; with right heart catheterization                                                                                                                                                                                                                 |
| 93457                       | Catheter placement in coronary artery(s) for coronary angiography, including intraprocedural injection(s) for coronary angiography, imaging supervision and interpretation;with catheter placement(s) in bypass graft(s) (internal mammary, free arterial, venous grafts) including intraprocedural injection(s) for bypass graft angiographyand right heart catheterization                                                 |
| 93458                       | Catheter placement in coronary artery(s) for coronary angiography, including intraprocedural injection(s) for coronary angiography, imaging supervision and interpretation;with left heart catheterization including intraprocedural injection(s) for left ventriculography, when performed                                                                                                                                  |
| 93459                       | Catheter placement in coronary artery(s) for coronary angiography, including intraprocedural injection(s) for coronary angiography, imaging supervision and interpretation;with left heart catheterization including intraprocedural injection(s) for left ventriculography, when performed,catheter placement(s) in bypass graft(s) (internal mammary, free arterial, venous grafts) with bypass graft angiography          |
| 93460                       | Catheter placement in coronary artery(s) for coronary angiography, including intraprocedural injection(s) for coronary angiography, imaging supervision and interpretation;with right and left heart catheterization including intraprocedural injection(s) for left ventriculography, when performed                                                                                                                        |
| 93461                       | Catheter placement in coronary artery(s) for coronary angiography, including intraprocedural injection(s) for coronary angiography, imaging supervision and interpretation;with rightand left heart catheterization including intraprocedural injection(s) for left ventriculography, when performed,catheter placement(s) in bypass graft(s) (internal mammary, free arterial, venous grafts) with bypass graft angiography |

**Supplemental Table S1b: CPT codes used to identify PCI, US:**

| <b>CPT code</b>                                            | <b>Description</b>                                                                              |
|------------------------------------------------------------|-------------------------------------------------------------------------------------------------|
| <b>Procedure years before 2013:</b>                        |                                                                                                 |
| Nonstent and stent procedures combined for all statistics: |                                                                                                 |
| Nonstent                                                   |                                                                                                 |
| 92982                                                      | Angioplasty, initial vessel                                                                     |
| 92984                                                      | Angioplasty, each additional vessel                                                             |
| 92995                                                      | Atherectomy, initial vessel                                                                     |
| 92996                                                      | Atherectomy, each additional vessel                                                             |
| Stent:                                                     |                                                                                                 |
| 92980                                                      | Stent placement, initial vessel                                                                 |
| 92981                                                      | Stent placement, each additional vessel                                                         |
| C1874                                                      | Stent, Coated/Covered, With Delivery System                                                     |
| C1875                                                      | Stent, Coated/Covered, Without Delivery System                                                  |
| G0290                                                      | Drug eluting stent, initial vessel                                                              |
| G0291                                                      | Drug eluting stent, each additional vessel                                                      |
| <b>Procedure year after 2013:</b>                          |                                                                                                 |
| nonstent:                                                  |                                                                                                 |
| 92920                                                      | Angioplasty, single artery or branch                                                            |
| 92921                                                      | Angioplasty, each additional                                                                    |
| 92924                                                      | Atherectomy, single artery or branch                                                            |
| 92925                                                      | Atherectomy, each additional                                                                    |
| stent:                                                     |                                                                                                 |
| 92928/C9600                                                | Stent placement, single artery or branch                                                        |
| 92929/C9601                                                | Stent placement, each additional                                                                |
| 92933/C9602                                                | Atherectomy with stent, single artery or branch                                                 |
| 92934/C9603                                                | Atherectomy with stent, each additional                                                         |
| grafts, acute occlusion, and CTO                           |                                                                                                 |
| 92937/C9604                                                | Graft revascularization, single vessel                                                          |
| 92938/C9605                                                | Graft revascularization, each additional branch                                                 |
| 92941/C9606                                                | Revascularization of acute total/subtotal occlusion during myocardial infarction, single vessel |
| 92943/C9607                                                | Revascularization of CTO, single vessel, native coronary artery, branch or bypass graft         |
| 92944/C9608                                                | Revascularization of CTO, each additional native coronary artery, branch or bypass graft        |

**Supplemental Table S1c: ICD-9 procedure codes used to identify CABG procedure, US:**

| <b>ICD-9</b> | <b>Description</b>                                                        |
|--------------|---------------------------------------------------------------------------|
| 361          | Bypass anastomosis for heart revascularization                            |
| 3610         | Aortocoronary bypass for heart revascularization, not otherwise specified |
| 3611         | (Aorto)coronary bypass of one coronary artery                             |
| 3612         | (Aorto)coronary bypass of two coronary arteries                           |
| 3613         | (Aorto)coronary bypass of three coronary arteries                         |
| 3614         | (Aorto)coronary bypass of four or more coronary arteries                  |
| 3615         | Single internal mammary-coronary artery bypass                            |
| 3616         | Double internal mammary-coronary artery bypass                            |
| 3617         | Abdominal - coronary artery bypass                                        |
| 3619         | Other bypass anastomosis for heart revascularization                      |

**Supplemental Table S2: Procedure Codes used in Ontario claims:**

| CCI                     | Description                        | Fee code | Description                                                |
|-------------------------|------------------------------------|----------|------------------------------------------------------------|
| CABG                    |                                    |          |                                                            |
| 11J76                   | BYPASS, CORONARY ARTERIES          | R742     | HEART PERI.-CORONARY ARTERY REPAIR-SINGLE                  |
| 11J80                   | REPAIR, CORONARY ARTERIES          | R743     | HEART PERI.-CORONARY ARTERY REPAIR-DOUBLE                  |
| PCI                     |                                    |          |                                                            |
| 11J50                   | DILATION, CORONARY ARTERIES        | Z434     | ANGIOGRAPHY-TRANSLUMINAL CORONARY ANGIOPLASTY              |
|                         |                                    | G298     | CORONARY ANGIOPLAST STENT                                  |
| Cardiac Catheterization |                                    |          |                                                            |
| 31P10                   | Xray, heart with coronary arteries | Z442     | D&TPROC.-CARDIOVASC.SELECTCORONARY CATHERIZ'N INC'L INJ.   |
|                         |                                    | Z440     | HAEMODYNAMIC/FLOW/METABOLIC STUDIES LT.HEART RETROG.AORT   |
|                         |                                    | G297     | D./T.PROC.CARDIAC CATH.-ANGIOGRAMS ONLY2 1 RT.HEART 1 LEFT |

**Supplemental Table S3: Overall rates of procedures at 3 days after index AMI admission, US and Ontario**

|      | US PCI | ONT PCI | US cath | ONT cath | US CABG | ONT CABG |
|------|--------|---------|---------|----------|---------|----------|
| 2003 | 25.4   | 5.2     | 46.5    | 11.9     | 5.0     | 0.4      |
| 2004 | 27.5   | 7.8     | 48.8    | 16.1     | 5.1     | 0.4      |
| 2005 | 29.3   | 10.5    | 50.3    | 20.4     | 4.9     | 0.6      |
| 2006 | 31.0   | 11.9    | 52.2    | 23.8     | 5.1     | 0.4      |
| 2007 | 30.3   | 16.2    | 51.9    | 30.5     | 5.0     | 0.5      |
| 2008 | 31.1   | 19.1    | 52.3    | 34.3     | 4.3     | 0.5      |
| 2009 | 32.8   | 23.2    | 54.6    | 39.2     | 4.5     | 0.5      |
| 2010 | 33.8   | 26.3    | 56.0    | 42.2     | 4.4     | 0.8      |
| 2011 | 34.9   | 29      | 56.7    | 45.5     | 4.0     | 0.6      |
| 2012 | 35.5   | 31.4    | 56.9    | 47.6     | 4.0     | 0.6      |
| 2013 | 36.1   | 34.6    | 57.1    | 51.8     | 4.0     | 0.6      |

Numbers represent Kaplan-Meier rate estimates, censoring for death and for entry into a managed care Medicare plan (US patients only).

**Supplemental Table S4: Rates of PCI at 3 days after index AMI admission, by predicted risk and AMI type, US and Ontario**

| Ontario |                   |        |      | United States     |        |      |
|---------|-------------------|--------|------|-------------------|--------|------|
|         | By AMI type       |        |      | By AMI type       |        |      |
|         | STEMI             | NSTEMI |      | STEMI             | NSTEMI |      |
| 2007    | 41.1              | 11.6   |      | 57.2              | 21.4   |      |
| 2008    | 44.4              | 11.8   |      | 60.4              | 22.4   |      |
| 2009    | 55.0              | 13.0   |      | 63.8              | 24.0   |      |
| 2010    | 64.3              | 14.2   |      | 66.4              | 24.8   |      |
| 2011    | 66.0              | 16.3   |      | 67.3              | 26.6   |      |
| 2012    | 70.8              | 18.5   |      | 70.1              | 26.8   |      |
| 2013    | 73.2              | 21.3   |      | 71.5              | 27.3   |      |
|         | By predicted risk |        |      | By predicted risk |        |      |
|         | Low               | Medium | High | Low               | Medium | High |
| 2003    | 8.4               | 1.7    | 2.6  | 35.5              | 17.1   | 12.2 |
| 2004    | 12.5              | 3.3    | 2.8  | 38.4              | 18.7   | 13.7 |
| 2005    | 17.5              | 3.8    | 3.9  | 40.8              | 20.2   | 15.9 |
| 2006    | 19.5              | 4.5    | 4.3  | 42.8              | 22.6   | 16.8 |
| 2007    | 23.8              | 6.7    | 6.6  | 41.7              | 22.1   | 17.0 |
| 2008    | 27.0              | 6.4    | 7.5  | 43.4              | 22.0   | 18.9 |
| 2009    | 30.0              | 9.3    | 14.0 | 44.8              | 24.3   | 19.6 |
| 2010    | 34.8              | 9.7    | 13.4 | 46.0              | 25.6   | 21.2 |
| 2011    | 37.9              | 11.6   | 15.1 | 47.4              | 25.7   | 22.4 |
| 2012    | 40.4              | 12.7   | 17.7 | 46.7              | 27.3   | 23.5 |
| 2013    | 43.6              | 15.4   | 19.0 | 47.3              | 27.6   | 24.0 |

Numbers represent Kaplan-Meier rate estimates, censoring for death and for entry into a managed care Medicare plan (US patients only).
