# Supplementary material
Source: PubMed Central journal article supplement (PMC7850174)
Supplement: supp_8.2.E437_2019-0190-original-submission.pdf [file supp_8.2.E437_2019-0190-original-submission.pdf]

# Cardiac intervention rates for acute myocardial infarction patients in the US and Ontario, 2003-2013: a retrospective cohort study

Brief title: Cardiac intervention rates in US and Ontario

Laura C. Yasaitis, PhD<sup>1</sup>, Dennis T. Ko, MD, MSc<sup>2,3,4</sup>, Jun Guan, MSc<sup>2</sup>, Amitabh Chandra, PhD<sup>5,6</sup>, Therese A. Stukel, PhD<sup>2,4,7</sup>

1. Leonard Davis Institute of Health Economics, University of Pennsylvania, Philadelphia PA, USA
2. ICES, Toronto, Ontario, Canada
3. Department of Medicine, Schulich Heart Centre, Sunnybrook Health Sciences Centre, University of Toronto, Canada
4. Institute of Health Policy, Management and Evaluation, University of Toronto, Canada
5. The John F. Kennedy School of Government, Harvard University, Cambridge MA, USA
6. National Bureau of Economics Research, Cambridge MA, USA
7. The Dartmouth Institute for Health Policy and Clinical Practice, Geisel School of Medicine, Lebanon NH, USA

## Corresponding Author Information:

Therese A. Stukel, PhD  
stukel@ices.on.ca

## Funding Statement

The study was supported through funding provided by a Foundation Grant (FDN 143303) from the Canadian Institutes of Health Research (CIHR) and by a grant from the U.S. National Institute on Aging, PO1 AG019783. The funding agencies had no role in the study design, the collection, analysis, or interpretation of data, the writing of the report, or the decision to submit the report for publication. The study was also supported by ICES, which is funded by an annual grant from the Ontario Ministry of Health and Long-Term Care (MOHLTC). The opinions, results and conclusions reported in this paper are those of the authors and are independent from the funding sources. No endorsement by ICES or the Ontario MOHLTC is intended or should be inferred.

## Competing Interests

No author has any relationship with industry or other conflicts of interest to disclose.

**Abstract**

Background: Previous work demonstrated higher cardiac intervention rates for acute myocardial infarction (AMI) patients in the US than Canada. Ontario, Canada, has a much lower supply of percutaneous coronary intervention (PCI) laboratories than the US (1.2 vs 7 per million residents, 2013). While PCI capabilities increased in both settings, improved timeliness of care associated with the increased supply of invasive cardiac resources is unknown.

Methods: Adults 66-99 years old in the US (N=414,216) and Ontario (N=112,484) between 2003-2013 were followed for 30 days after admission for incident AMI. Rates of cardiac catheterization, PCI and coronary artery bypass graft on the day and within 30 days of admission were calculated overall and according to AMI type (ST-elevation (STEMI), non-ST-elevation (NSTEMI)) and risk subgroup (low, medium, high predicted risk of 30-day mortality).

Results: Large disparities in cardiac intervention rates in 2003 mostly disappeared over time. By 2013, patients with STEMI received PCI at nearly identical rates in both countries on day of admission (US, 66.3% vs. Ontario, 63.8%). High-risk patients received PCI slightly earlier in the US; same day rates were 17.6% vs. 14.9% but high-risk STEMI patients received PCI more frequently in the US both on day of admission (55.5% vs. 44.7%) and by 30 days (60.5% vs. 55%).

Interpretation: Despite differences in resources and organization of delivery systems, timely receipt of PCI for Ontario AMI patients lags only slightly behind US patients. A higher supply of PCI centers in the US may facilitate earlier intervention among high-risk STEMI patients.

## Introduction

Cardiovascular disease is responsible for substantial morbidity and mortality in both the US and Canada. Given the two countries' demographic and cultural similarities, there are frequent comparisons between health care trends in the two countries (1-10). Although cardiac testing and procedure rates among AMI patients increased rapidly in both countries between 1993 and 2001, capacity and procedure rates for invasive cardiac interventions were higher in the US than Ontario, Canada, throughout this period (1-8). As of the early 2000's, patients with acute myocardial infarction (AMI) received timely percutaneous coronary intervention (PCI) more frequently in the US than Canada (3-6).

By 2003, evidence from trials had demonstrated the superiority of percutaneous coronary intervention (PCI) over fibrinolytic therapy for ST-segment elevation AMI (STEMI), with the greatest benefit occurring immediately after symptom onset (11,12). Further studies demonstrated benefit of timely PCI for patients with non-ST-segment elevation MI (NSTEMI), particularly for high-risk patients (13-18). Rapid reperfusion is the guideline-recommended care in both countries (11,19). Although Canadian PCI capacity has increased substantially, the number of PCI-capable sites remains higher in the US. In the US, there were nearly seven PCI-capable sites per million residents by 2011 (20). In Ontario, the number rose from 12 in 2003 to 16 in 2012, or 1.2 per million residents; accompanying this expansion was a 2004 policy report recommending primary PCI as the first-line treatment for STEMI (19) after studies demonstrated the feasibility of transferring STEMI patients for PCI (21-23).

To see whether Ontario's efforts to improve rapid PCI for AMI closed the gap between the two

1  
2  
3 countries, we examined trends in rates and timing of PCI for elderly AMI patients using health  
4 administrative data from the US and Ontario. Additionally, we examined whether increases in  
5  
6 early invasive cardiac services for elderly AMI patients were targeted to higher vs. lower  
7  
8 severity patients.  
9  
10

## 11 12 13 14 15 16 17 **Methods**

### 18 19 *Study Cohorts*

20  
21 Study patients comprised US and Ontario residents hospitalized with first (index) admission for  
22 AMI to an acute care hospital between January 1, 2003 and December 31, 2013, restricting to  
23 adults age 66 to 99. To capture incident admissions, we excluded patients admitted for AMI  
24 during the previous year. We excluded those with a stay of less than one day. We included the  
25 first eligible admission when patients had multiple admissions, and followed patients for 30 days  
26 after index admission date.  
27  
28  
29  
30  
31  
32  
33  
34  
35  
36  
37

38 In the US, incident AMI was defined as the first inpatient claim with primary ICD-9 diagnosis  
39 code 410 (except 410.x2, which indicates readmission or follow-up care), an approach validated  
40 previously (24). We excluded patients with <12 months fee for service (FFS) Medicare coverage  
41 before their index event, allowing a one-year lookback for comorbidities and previous AMI  
42 admissions. For patients who switched into managed care Medicare plans after their index  
43 admission, the date of coverage change was noted.  
44  
45  
46  
47  
48  
49  
50  
51  
52  
53

54 In Ontario, incident AMI was defined as the first hospitalization with most responsible diagnosis  
55  
56  
57  
58  
59  
60

1  
2  
3 (MRD) ICD-10-CA code I21 between April 1, 2003 (the first day of the Canadian fiscal year)  
4  
5 and December 31, 2013. This approach has good performance in identifying AMI and AMI  
6  
7 subtype (25,26). To assess prior comorbidities, we excluded patients with <12 months of Ontario  
8  
9 Health Insurance Plan (OHIP) eligibility prior to the index admission. We also excluded  
10  
11 admissions where AMI was an inhospital complication.  
12  
13  
14  
15  
16

17 In both countries, we created an index episode of care beginning at initial admission and ending  
18  
19 at final discharge, incorporating transfers. The index admission could not be a transfer. In the  
20  
21 US, transfers were identified as a hospitalization whose admission date matched the discharge  
22  
23 date of a previous hospitalization, or where the admission source indicated a transfer. In Ontario,  
24  
25 a 12-hour rule was used to distinguish transfers from readmissions. In the US, of 455,816  
26  
27 potential index admissions, 34,914 were excluded due to being transferred, and 6,686 with length  
28  
29 of stay <1 day; in Ontario, of 131,516 potential index admissions, 15,765 and 3,267 were  
30  
31 excluded for these reasons, respectively.  
32  
33  
34  
35  
36  
37

### 38 *Outcomes*

39  
40 The primary outcomes were invasive cardiac procedures, specifically, coronary angiography or  
41  
42 cardiac catheterization, percutaneous coronary intervention (PCI) and coronary artery grafting  
43  
44 (CABG) on day of admission and 3 and 30 days after index admission. Rates were calculated  
45  
46 using Kaplan-Meier (KM) estimates, separately by country. We censored for HMO entry (US  
47  
48 cohorts) and death. Procedure codes are provided in Appendix Tables 1 and 2.  
49  
50  
51  
52  
53

### 54 *Covariates*

1  
2  
3 Comorbidities were identified from all hospitalizations during the 12 months prior to and during  
4 the index admission. In the US, diagnosis codes were aggregated to create indicators for selected  
5 hierarchical condition code (HCC) categories (27) from a previously validated AMI mortality  
6 risk prediction model (28). In Ontario, comorbidity groups were created that closely matched the  
7 HCC categories. Rurality of patient residence was determined. In the US, the ZIP code of  
8 residence was classified as rural or urban based on the ZIP code Rural-Urban Commuting Areas  
9 geographic taxonomy (29). In Ontario, patient rurality was measured using the Rurality Index of  
10 Ontario (RIO) which accounts for population size and travel time, categorized as urban (RIO 0–  
11 9) or nonurban (RIO  $\geq 10$ ) (30).  
12  
13  
14  
15  
16  
17  
18  
19  
20  
21  
22  
23  
24  
25

#### 26 *Data sources*

27  
28 The US cohort was identified using claims from a 20% random sample of FFS Medicare  
29 beneficiaries. These claims contain information about inpatient, outpatient and physician  
30 services. MedPAR and Carrier claims were used to identify whether a patient received a cardiac  
31 catheterization, PCI or CABG and the date it was performed. Patient comorbidities were  
32 identified from the first and second diagnosis codes of hospitalizations.  
33  
34  
35  
36  
37  
38  
39  
40  
41

42 In Ontario, patient records were linked using unique, anonymized, encrypted identifiers across  
43 multiple Ontario health administrative databases containing information on all publicly insured,  
44 medically necessary hospital and physician services. These include the Discharge Abstract  
45 Database (DAD) for hospital admissions, procedures and transfers that includes the most  
46 responsible diagnosis (MRD) for length of stay, secondary diagnosis codes, comorbidities  
47 present upon admission, complications during the hospital stay; the National Ambulatory Care  
48  
49  
50  
51  
52  
53  
54  
55  
56  
57  
58  
59  
60

1  
2  
3 Reporting System (NACRS) for same day surgeries; OHIP for physician billings that includes  
4 diagnosis codes and procedures; and the Registered Persons Database (RPDB) for patient  
5 demographic information and deaths. Comorbidities were identified using secondary DAD  
6 diagnosis fields, excluding index admission complications. Cardiac procedure dates were  
7 determined from DAD and NACRS, supplementing with OHIP billing dates when necessary.  
8  
9  
10  
11  
12  
13  
14 Except for AMI subtype, which was not coded in Ontario health administrative data before 2007,  
15  
16 no covariates had missing values.  
17  
18  
19  
20

### 21 *Statistical Analyses*

22  
23 For each cohort, we developed a baseline patient severity score using logistic regression to  
24 predict 30-day mortality, incorporating all baseline patient characteristics and comorbidities  
25  
26 (c=0.73 and 0.80, US and Ontario, respectively). Mean predicted mortality was used as a  
27  
28 summary measure of patient severity because it incorporated all measured patient risk factors as  
29  
30 in other studies (31). The 30-day predicted risk score was categorized as low (<10%), medium  
31  
32 (10-20%) and high (>20%).  
33  
34  
35  
36  
37  
38  
39

40 We compared age-sex standardized procedure rates across patients within subtypes of AMI  
41 (STEMI vs. NSTEMI) and within predicted risk groups. Ontario did not code type of AMI until  
42  
43 2007, so these analyses focused on the later years. In secondary analyses, we compared rates  
44  
45 across high-risk patients according to AMI type, and among STEMI patients residing in urban  
46  
47 vs. rural settings to assess the potential role that access to PCI facilities may play. Our sample is  
48  
49 so large that absolute rate differences of <0.5% in the smallest subgroup are statistically  
50  
51 significant at the 0.1% level. We have therefore not reported p-values and comment on clinically  
52  
53  
54  
55  
56  
57  
58  
59  
60

1  
2  
3 important differences.  
4  
5  
6

### 7 *Sensitivity analyses*

8  
9  
10 In sensitivity analyses, we re-estimated the rates in several ways. We estimated uncensored  
11 proportions rather than Kaplan-Meier rates to examine sensitivity to censoring. Due to concerns  
12 that different distributions of predicted risk between the two countries might bias our estimates,  
13 we re-weighted the Ontario cohort to closely resemble the US using a nonparametric approach.  
14  
15 The risk scores at each Ontario percentile were determined, and the proportion of US patients  
16 falling within each risk score interval was used to re-weight the Ontario percentiles (32). KM  
17 rates were re-estimated with these new weights.  
18  
19  
20  
21  
22  
23  
24  
25  
26  
27

28 The Ontario study was approved by the Research Ethics Board of Sunnybrook Health Sciences  
29 Centre. The US study was approved by the Institutional Review Board of the National Bureau of  
30 Economic Research, Cambridge, MA. Data use restrictions in both countries prohibited  
31 exporting individual-level data so we were unable to pool the data into a single analytic dataset.  
32  
33  
34  
35  
36  
37  
38  
39

## 40 **Results**

41  
42 During 2003-2013, there were 414,216 patients with incident AMI in the US, and 112,484 in  
43 Ontario who met our inclusion criteria. The cohorts had similar age distributions, mean baseline  
44 severity (predicted 30-day mortality risk, 13.57% vs. 13.75%), and proportions of high-risk  
45 patients (Table 1). Nearly one quarter of patients in each country had a STEMI. The number of  
46 AMI patients declined in both countries over time. Comorbidity prevalences were generally  
47 similar between the two countries (Table 2).  
48  
49  
50  
51  
52  
53  
54  
55  
56  
57  
58  
59  
60



1  
2  
3  
4  
5  
6 We compared overall rates of each cardiac procedure within 30 days of incident AMI admission  
7  
8 over 2003 to 2013. The large differences in rates for all procedures in 2003 steadily diminished  
9  
10 over time (Figure 1). By 2013, same-day PCI rates were only slightly higher in the US (22.3%  
11  
12 US vs. 19.2% Ontario) while 30-day rates were slightly higher in Ontario (41.3% US vs. 44.0%  
13  
14 in Ontario). Three-day rates are reported in Appendix Table 3. The gap in 30-day CABG rates  
15  
16 decreased as well; this was associated with a decline in US rates while Canadian rates held  
17  
18 steady. Cardiac catheterization rates mirrored patterns of PCI rates.  
19  
20  
21  
22  
23

24 Figure 2 compares timing of PCI from 2007 to 2013 by AMI type. While there were substantial  
25  
26 differences for STEMI patients in 2007, these largely disappeared by 2013, when same-day and  
27  
28 30-day rates were almost identical in the two countries (66.3% vs. 63.8%, and 73.2% vs. 76.6%,  
29  
30 respectively). The US had higher same-day PCI rates for NSTEMI patients (11.3% vs. 3.9%)  
31  
32 although 30-day rates were almost identical (33.3% vs 32.8%). Three-day rates are reported in  
33  
34 Appendix Table 4.  
35  
36  
37  
38  
39

40 We examined relative changes in PCI rates over 2003–2013 for subgroups of patients according  
41  
42 to predicted risk (Figure 3). There were large differences across countries for all risk groups in  
43  
44 2003. By 2013, the differences narrowed substantially although US rates remained higher. For  
45  
46 high-risk patients, same-day PCI rates were 17.6% vs. 14.9% in the US vs. Ontario, and 27.7%  
47  
48 vs. 24.4% at 30 days. PCI rates for low risk patients were almost identical by 2013.  
49  
50  
51  
52  
53

54 In secondary analyses, we examined differences for high-risk patients by AMI subtype (Figure  
55  
56  
57  
58  
59  
60

1  
2  
3 4). High-risk STEMI and NSTEMI patients received PCI earlier and more frequently in the US,  
4  
5 although rates increased over time in both countries and the gap narrowed considerably by 2013.  
6  
7 Same-day PCI rates for high-risk STEMI patients were 55.5% vs. 44.7%, and 30-day rates were  
8  
9 60.5% vs. 55.0% in the US vs. Ontario, respectively. High-risk NSTEMI patients received PCI  
10  
11 earlier and more frequently in the US, with same day rates of 4.9% and 1.5% in the US vs.  
12  
13 Ontario, and 30-day rates of 17.5% vs. 10.4%.  
14  
15  
16  
17  
18

19 Finally, we examined PCI rates for STEMI patients according to urban and rural residence  
20  
21 (Figure 5). PCI rates for urban dwelling STEMI patients in Ontario were higher than for urban  
22  
23 US patients. However, rural US STEMI patients received PCI at higher rates than those in  
24  
25 Ontario, especially on the same day.  
26  
27  
28  
29  
30

31 In sensitivity analyses, alternative estimation approaches revealed negligible differences from the  
32  
33 primary analyses. Unadjusted and adjusted KM rates were nearly identical. Re-weighting the  
34  
35 Ontario patient population to have a similar predicted mortality distribution to that of the US  
36  
37 made little difference to our findings.  
38  
39  
40  
41

## 42 **Discussion**

43  
44 We compared rates and timing of cardiac procedures for elderly AMI patients in the US and  
45  
46 Ontario over 2003-2013. US PCI rates were substantially higher in 2003 but Ontario largely  
47  
48 closed the gap by 2013, especially for STEMI patients. Same-day PCI rates increased  
49  
50 substantially in both the US and Ontario, likely due to increased capacity and a greater emphasis  
51  
52 on early PCI for STEMI patients. There was a dramatic increase in same-day rates among  
53  
54  
55  
56  
57  
58  
59  
60

1  
2  
3 STEMI patients in Ontario. This suggests that Ontario's policy of increasing PCI capability and  
4 staffing, and its hub and spoke model of invasive cardiac care where AMI patients are  
5 transported to PCI facilities for same-day procedures and transferred back to their primary  
6 hospital as soon as feasible, resulted in STEMI patients' having timely access to cardiac  
7 catheterization and PCI. However, given the limited evidence for utility of PCI after the  
8 immediate post-AMI period, higher rates of PCI after 3 days may include some procedures with  
9 limited benefit.  
10  
11  
12  
13  
14  
15  
16  
17  
18  
19  
20

21 For high-risk NSTEMI patients, PCI rates were higher in the US than in Ontario, one of the few  
22 remaining differences between the two countries, although both countries' absolute rates were  
23 low for this subgroup. Numerous factors may cause PCI rates to be lower than desired. Sicker  
24 patients may require care in a cardiac intensive care unit (CICU) rather than a short stay unit;  
25 higher demand for CICU beds may increase delays in care. In Ontario, because some patients  
26 required same-day transportation to a PCI facility, sicker patients may have been deemed too  
27 unstable for transfer. Higher PCI rates among high-risk US NSTEMI patients likely reflects the  
28 greater supply of PCI-capable facilities. Higher rates among rural US patients likely reflects the  
29 fact that rural regions in northern Ontario are extremely remote, often requiring helicopter  
30 transport of patients to the nearest PCI facility. Interpretation is challenging since the  
31 characterization of rurality differs by country.  
32  
33  
34  
35  
36  
37  
38  
39  
40  
41  
42  
43  
44  
45  
46  
47  
48

49 This study has several limitations. As in all studies using administrative claims, data on patients'  
50 clinical presentation were limited to recorded diagnoses. Lack of full clinical data and inability to  
51 combine datasets from the two countries, precluded us from directly comparing other important  
52  
53  
54  
55  
56  
57  
58  
59  
60

1  
2  
3 outcomes such as mortality. Comparisons of mortality would have required fine adjustment for  
4  
5 confounding for unobserved factors such as disease severity, smoking status, and clinician  
6  
7 judgment regarding who might benefit to affect which patients received PCI. This lack of clinical  
8  
9 data also prevented us from exploring appropriateness of care. Our study is limited to Ontario so  
10  
11 findings may not generalize to other Canadian provinces; yet, given Ontario's size and diversity,  
12  
13 and similar regulation of invasive cardiac resources, these findings likely reflect trends in the rest  
14  
15 of the country.  
16  
17  
18  
19  
20

21 In summary, substantial initial disparities in 2003 in cardiac intervention rates for AMI,  
22  
23 especially STEMI patients, in the US and Ontario largely disappeared by 2013 despite  
24  
25 differences in resources and organization of delivery systems. Higher supply of PCI-capable  
26  
27 centers in the US may facilitate earlier and more interventions, especially among patients who  
28  
29 are difficult to transfer promptly for treatment.  
30  
31  
32  
33  
34  
35  
36  
37  
38  
39  
40  
41  
42  
43  
44  
45  
46  
47  
48  
49  
50  
51  
52  
53  
54  
55  
56  
57  
58  
59  
60

## References

- 1 Tu JV, Pashos CL, Naylor CD, Chen E, Normand S, Newhouse JP, et al. Use of cardiac procedures and outcomes in elderly patients with myocardial infarction in the United States and Canada. *N Engl J Med* 1997;336(21):1500-1505.
- 2 Fu Y, Chang WC, Mark D, Califf RM, Mackenzie B, Granger CB, et al. Canadian-American differences in the management of acute coronary syndromes in the GUSTO IIb trial: one-year follow-up of patients without ST-segment elevation. *Global Use of Strategies to Open Occluded Coronary Arteries (GUSTO) II Investigators. Circulation* 2000 Sep 19;102(12):1375-1381.
- 3 Kaul P, Armstrong PW, Chang WC, Naylor CD, Granger CB, Lee KL, et al. Long-term mortality of patients with acute myocardial infarction in the United States and Canada: comparison of patients enrolled in Global Utilization of Streptokinase and t-PA for Occluded Coronary Arteries (GUSTO)-I. *Circulation* 2004 Sep 28;110(13):1754-1760.
- 4 Alter DA, Stukel TA, Newman A. Proliferation of cardiac technology in Canada. *Circulation*. 2006 Jan 24;113(3):380-7.
- 5 Lucas FL, DeLorenzo MA, Siewers AE, Wennberg DE. Temporal trends in the utilization of diagnostic testing and treatments for cardiovascular disease in the United States, 1993-2001. *Circulation* 2006 Jan 24;113(3):374-379.
- 6 Ayanian JZ. Rising rates of cardiac procedures in the United States and Canada: too much of a good thing? *Circulation* 2006 Jan 24; 113(3): 333-335
- 7 Ko DT, Krumholz HM, Wang Y, Foody JM, Masoudi FA, Havranek EP, et al. Regional differences in process of care and outcomes for older acute myocardial infarction patients in the United States and Ontario, Canada. *Circulation* 2007 Jan 16;115(2):196-203.
- 8 Ko DT, Tu JV, Samadashvili Z, Guo H, Alter DA, Cantor WJ, et al. Temporal trends in the

1  
2  
3 use of percutaneous coronary intervention and coronary artery bypass surgery in New York State  
4 and Ontario. *Circulation* 2010 Jun 22;121(24):2635-2644.

7  
8 9 Ko DT, Tu JV, Austin PC, Wijeyesundera HC, Samadashvili Z, Guo H, et al. Prevalence and  
9 extent of obstructive coronary artery disease among patients undergoing elective coronary  
10 catheterization in New York State and Ontario. *JAMA*. 2013 Jul 10;310(2):163-9.

14  
15 10 Smith-Bindman R, Kwan ML, Marlow EC, Theis MK, Bolch W, Cheng SY, et al. Trends in  
16 Use of Medical Imaging in US Health Care Systems and in Ontario, Canada, 2000-2016. *JAMA*.  
17 2019 Sep 3;322(9):843-56.

21  
22 11 Antman EM, Anbe DT, Armstrong PW, Bates ER, Green LA, Hand M, et al. ACC/AHA  
23 guidelines for the management of patients with ST-elevation myocardial infarction: a report of  
24 the American College of Cardiology/American Heart Association Task Force on Practice  
25 Guidelines (Committee to Revise the 1999 Guidelines for the Management of Patients with  
26 Acute Myocardial Infarction). *J Am Coll Cardiol*. 2004 Aug; 44(3):E1-E211.

33  
34 12 Keeley EC, Boura JA, Grines CL. Primary angioplasty versus intravenous thrombolytic  
35 therapy for acute myocardial infarction: a quantitative review of 23 randomised trials. *The*  
36 *Lancet* 2003 Jan 4;361(9351):13-20.

39  
40 13 Cannon CP, Weintraub WS, Demopoulos LA, Vicari R, Frey MJ, Lakkis N, et al.  
41 Comparison of early invasive and conservative strategies in patients with unstable coronary  
42 syndromes treated with the glycoprotein IIb/IIIa inhibitor tirofiban. *N Engl J Med* 2001 Jun  
43 21;344(25):1879-1887.

49  
50 14 Fox K, Poole-Wilson P, Henderson R, Clayton T, Chamberlain D, Shaw T, et al.  
51 Interventional versus conservative treatment for patients with unstable angina or non-ST-  
52 elevation myocardial infarction: the British Heart Foundation RITA 3 randomised trial. *The*  
53 *Lancet* 2006 Jun 3;367(9528):1485-93.

1  
2  
3 Lancet 2002 Sep 7;360(9335):743-751.  
4

5 15 Solomon DH, Stone PH, Glynn RJ, Ganz DA, Gibson CM, Tracy R, et al. Use of risk  
6 stratification to identify patients with unstable angina likeliest to benefit from an invasive versus  
7 conservative management strategy. J Am Coll Cardiol 2001 Oct 1;38(4):969-976.  
8  
9

10 16 Braunwald E. Application of current guidelines to the management of unstable angina and  
11 non-ST-elevation myocardial infarction. Circulation 2003 Oct 21;108(16 Suppl 1):III28-37.  
12  
13

14 17 Bach RG, Cannon CP, Weintraub WS, DiBattiste PM, Demopoulos LA, Anderson HV, et al.  
15 The effect of routine, early invasive management on outcome for elderly patients with non-ST-  
16 segment elevation acute coronary syndromes. Ann Intern Med 2004 Aug 3;141(3):186-195.  
17  
18

19 18 Mehta SR, Granger CB, Boden WE, Steg PG, Bassand J, Faxon DP, et al. Early versus  
20 delayed invasive intervention in acute coronary syndromes. N Engl J Med 2009 May  
21 21;360(21):2165-2175.  
22  
23

24 19 Ontario Health Technology Advisory Committee. OHTAC recommendation. Primary  
25 Angioplasty 2004:1-5.  
26  
27

28 20 Langabeer JR, Henry TD, Kereiakes DJ, Dellifraire J, Emert J, Wang Z, et al. Growth in  
29 percutaneous coronary intervention capacity relative to population and disease prevalence. J Am  
30 Heart Assoc 2013 Oct 28;2(6):e000370.  
31  
32

33 21 Cantor WJ, Fitchett D, Borgundvaag B, Ducas J, Heffernan M, Cohen EA, et al. Routine  
34 early angioplasty after fibrinolysis for acute myocardial infarction. N Engl J Med 2009 Jun  
35 25;360(26):2705-2718.  
36  
37

38 22 Le May MR, So DY, Dionne R, Glover CA, Froeschl MP, Wells GA, et al. A citywide  
39 protocol for primary PCI in ST-segment elevation myocardial infarction. N Engl J Med 2008 Jan  
40 17;358(3):231-240.  
41  
42

- 1  
2  
3 23 Andersen HR, Nielsen TT, Rasmussen K, Thuesen L, Kelbaek H, Thayssen P, et al. A  
4 comparison of coronary angioplasty with fibrinolytic therapy in acute myocardial infarction. N  
5 Engl J Med 2003 Aug 21;349(8):733-742.  
6  
7  
8  
9  
10 24 Kiyota Y, Schneeweiss S, Glynn RJ, Cannuscio CC, Avorn J, Solomon DH. Accuracy of  
11 Medicare claims-based diagnosis of acute myocardial infarction: estimating positive predictive  
12 value on the basis of review of hospital records. American heart journal. 2004 Jul 1;148(1):99-  
13 104.  
14  
15  
16  
17  
18  
19 25 Juurlink D, Preyra C, Croxford R, Chong A, Austin P, Tu JV, Laupacis A. Canadian Institute  
20 for Health Information discharge abstract database: a validation study. Toronto: Institute for  
21 Clinical Evaluative Sciences, 2006.  
22  
23  
24  
25  
26 26 Patel AB, Quan H, Welsh RC, Deckert-Sookram J, Tymchak W, Sookram S, et al. Validity  
27 and utility of ICD-10 administrative health data for identifying ST-and non-ST-elevation  
28 myocardial infarction based on physician chart review. CMAJ open. 2015 Oct;3(4):E413.  
29  
30  
31  
32  
33 27 Pope GC, Kautter J, Ellis RP, Ash AS, Ayanian JZ, Iezzoni LI, et al. Risk adjustment of  
34 Medicare capitation payments using the CMS-HCC model. Health Care Financ Rev  
35 2004;25(4):119-142.  
36  
37  
38  
39  
40 28 Krumholz HM, Wang Y, Mattera JA, Wang Y, Han LF, Ingber MJ, et al. An administrative  
41 claims model suitable for profiling hospital performance based on 30-day mortality rates among  
42 patients with an acute myocardial infarction. Circulation. 2006 Mar 20;113(13):1683-1692.  
43  
44  
45  
46  
47 29 Hart G. Temporary ZIP RUCA 3.10 file access page [Internet]. Grand Forks (ND):  
48 University of North Dakota Center for Rural Health; 2014 Aug 4 [cited 2018 August 28].  
49 Available from: <https://ruralhealth.und.edu/ruca>  
50  
51  
52  
53  
54 30 Kralj B. Measuring Rurality -- RIO2008\_BASIC: Methodology and Results. Toronto: Ontario  
55  
56  
57  
58  
59  
60



1  
2  
3 Medical Association; 2009  
4

5 31 Stukel TA, Fisher ES, Alter DA, Guttman A, Ko DT, Fung K, et al. Association of hospital  
6 spending intensity with mortality and readmission rates in Ontario hospitals. JAMA. 2012 Mar  
7  
8 14;307(10):1037-45.  
9  
10

11 32 Barsky R, Bound J, Charles KK, Lupton JP. Accounting for the black–white wealth gap: a  
12 nonparametric approach. Journal of the American statistical Association 2002 Sep  
13  
14 1;97(459):663-673.  
15  
16  
17  
18  
19  
20  
21  
22  
23  
24  
25  
26  
27  
28  
29  
30  
31  
32  
33  
34  
35  
36  
37  
38  
39  
40  
41  
42  
43  
44  
45  
46  
47  
48  
49  
50  
51  
52  
53  
54  
55  
56  
57  
58  
59  
60

Confidential

**Figures:**

*Figure 1: Rates of selected procedures on day of admission and 30 days after AMI*

Numbers represent Kaplan-Meier rate estimates, censoring for death or entry into a managed care Medicare plan (US patients only).

*Figure 2: PCI rates on day of admission and 30 days after AMI, by type of AMI*

Numbers represent Kaplan-Meier rate estimates, censoring for death or entry into a managed care Medicare plan (US patients only).

*Figure 3: PCI rates on day of admission and 30 days after AMI, by risk category*

Numbers represent Kaplan-Meier rate estimates, censoring for death or entry into a managed care Medicare plan (US patients only). Risk groups were determined based on predicted 30-day mortality as low <10%, medium 10-20%, and high > 20%.

*Figure 4: PCI rates on day of admission and 30 days after AMI among high-risk patients, by type of AMI*

Numbers represent Kaplan-Meier rate estimates, censoring for death or entry into a managed care Medicare plan (US patients only).

*Figure 5: PCI rates on day of admission and 30 days after AMI for rural and urban residents with STEMI in the US and Ontario*

Numbers represent Kaplan-Meier rate estimates, censoring for death or entry into a managed care Medicare plan (US patients only).

Table 1: Characteristics of the study cohort in US and Ontario

|                                    | Ontario           | US                |
|------------------------------------|-------------------|-------------------|
| N                                  | 112484            | 414216            |
| Male                               | 60,921 (54.2%)    | 207,968 (50.2%)   |
| Age category                       |                   |                   |
| 66-70                              | 20,223 (18.0%)    | 75,202 (18.2%)    |
| 71-75                              | 21,584 (19.2%)    | 79,364 (19.2%)    |
| 76-80                              | 23,725 (21.1%)    | 83,816 (20.2%)    |
| 81-85                              | 23,306 (20.7%)    | 81,194 (19.6%)    |
| 86-90                              | 15,757 (14.0%)    | 60,094 (14.5%)    |
| 91-99                              | 7,889 (7.0%)      | 34,546 (8.3%)     |
| Predicted risk of 30 day mortality |                   |                   |
| Mean ( $\pm$ SD)                   | 13.75 $\pm$ 15.04 | 13.57 $\pm$ 10.32 |
| Risk groups:                       |                   |                   |
| low (<10)                          | 64,374 (57.2%)    | 191,419 (46.2%)   |
| medium (10-20)                     | 26,930 (23.9%)    | 141,434 (34.1%)   |
| high (>20)                         | 21,180 (18.8%)    | 81,363 (19.6%)    |
| Year of index event                |                   |                   |
| 2003 (9 months Canada)             | 8,771 (7.8%)      | 48007 (11.6%)     |
| 2004                               | 11,511 (10.2%)    | 45845 (11.1%)     |
| 2005                               | 11,111 (9.9%)     | 43166 (10.4%)     |
| 2006                               | 10,182 (9.1%)     | 39844 (9.6%)      |
| 2007                               | 10,181 (9.1%)     | 37622 (9.1%)      |
| 2008                               | 10,689 (9.5%)     | 36241 (8.8%)      |
| 2009                               | 9,738 (8.7%)      | 33577 (8.1%)      |
| 2010                               | 10,108 (9.0%)     | 33651 (8.1%)      |
| 2011                               | 9,877 (8.8%)      | 33021 (8.0%)      |
| 2012                               | 10,087 (9.0%)     | 32554 (7.9%)      |
| 2013                               | 10,229 (9.1%)     | 30688 (7.4%)      |
| AMI type (post-07 for CDN)         |                   |                   |
| STEMI                              | 16,388 (23.9%)    | 100,802 (24.3%)   |
| Non-STEMI                          | 50,667 (74.0%)    | 313,414 (75.7%)   |
| Missing                            | 1,456 (2.1%)      |                   |
| Pre-FY 2007 (CDN)                  | 43,973 (39.1%)    |                   |

Values represent a 20% sample of US Medicare fee-for-service beneficiaries and 100% sample of Ontario patients.

Table 2: Prevalence of comorbidities in the study cohort in the US and Ontario

|                                                        | Ontario        | United States   |
|--------------------------------------------------------|----------------|-----------------|
| History of PCI                                         | 944 (0.8%)     | 8,380 (2.0%)    |
| History of CABG                                        | 301 (0.3%)     | 1,706 (0.4%)    |
| History of heart failure (CHF)                         | 28,993 (25.8%) | 111,053 (26.8%) |
| Unstable Angina                                        | 4,444 (4.0%)   | 12,112 (2.9%)   |
| Atherosclerosis and other ischemic heart disease       | 30,064 (26.7%) | 81,293 (19.6%)  |
| Shock and cardiorespiratory failure                    | 8,215 (7.3%)   | 37,850 (9.1%)   |
| Valvular heart disease                                 | 2,248 (2.0%)   | 14,038 (3.4%)   |
| Hypertension                                           | 8,729 (7.8%)   | 24,822 (6.0%)   |
| Cerebrovascular disease                                | 2,980 (2.6%)   | 11,684 (2.8%)   |
| Renal disease                                          | 12,216 (10.9%) | 45,262 (10.9%)  |
| COPD or bronchitis                                     | 7,274 (6.5%)   | 30,767 (7.4%)   |
| Pneumonia                                              | 10,501 (9.3%)  | 38,972 (9.4%)   |
| Diabetes                                               | 7,415 (6.6%)   | 19,437 (4.7%)   |
| Protein calorie malnutrition                           | 739 (0.7%)     | 2,501 (0.6%)    |
| Dementia                                               | 2,120 (1.9%)   | 5,354 (1.3%)    |
| Hemiplegia, paraplegia, paralysis, function disability | 1,317 (1.2%)   | 4,397 (1.1%)    |
| Peripheral vascular disease                            | 2,772 (2.5%)   | 12,070 (2.9%)   |
| Metastatic cancer                                      | 1,237 (1.1%)   | 4,959 (1.2%)    |
| Trauma                                                 | 3,461 (3.1%)   | 12,078 (2.9%)   |
| Psychiatric disorders, major                           | 1,158 (1.0%)   | 2,299 (0.6%)    |
| Liver disease, acute/chronic                           | 520 (0.5%)     | 638 (0.2%)      |

Comorbidities include conditions identified from claims associated with the index admission and admissions in previous 1 year except history of PCI or CABG where only claims prior to the index admission were used.

1  
2  
3  
4  
5  
6  
7  
8  
9  
10  
11  
12  
13  
14  
15  
16  
17  
18  
19  
20  
21  
22  
23  
24  
25  
26  
27  
28  
29  
30  
31  
32  
33  
34  
35  
36  
37  
38  
39  
40  
41  
42  
43  
44  
45  
46  
47  
48  
49  
50  
51  
52  
53  
54  
55  
56  
57  
58  
59  
60

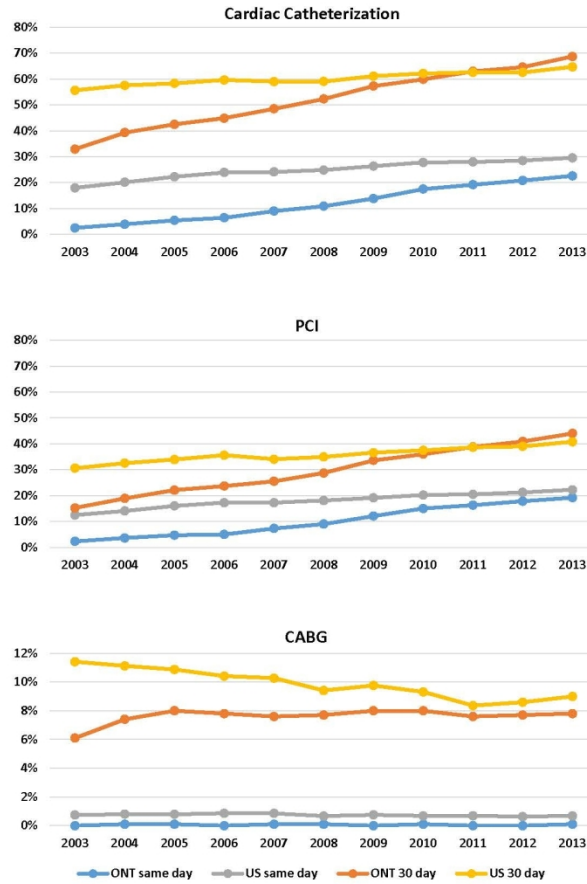

Figure 1 - Rates of selected procedures on day of admission and 30 days after AMI  
215x279mm (200 x 200 DPI)

1  
2  
3  
4  
5  
6  
7  
8  
9  
10  
11  
12  
13  
14  
15  
16  
17  
18  
19  
20  
21  
22  
23  
24  
25  
26  
27  
28  
29  
30  
31  
32  
33  
34  
35  
36  
37  
38  
39  
40  
41  
42  
43  
44  
45  
46  
47  
48  
49  
50  
51  
52  
53  
54  
55  
56  
57  
58  
59  
60

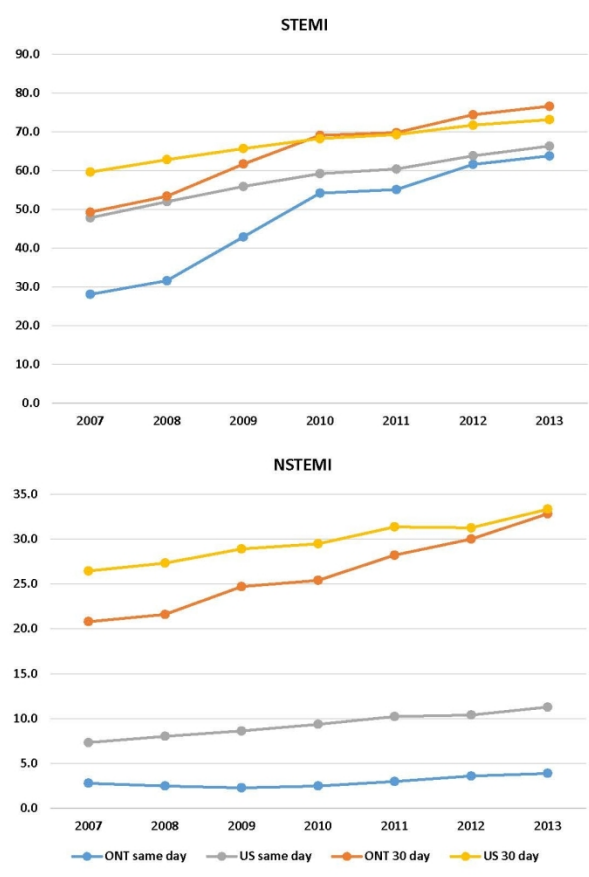

Figure 2- PCI rates on day of admission and 30 days after AMI, by type of AMI  
215x279mm (200 x 200 DPI)

1  
2  
3  
4  
5  
6  
7  
8  
9  
10  
11  
12  
13  
14  
15  
16  
17  
18  
19  
20  
21  
22  
23  
24  
25  
26  
27  
28  
29  
30  
31  
32  
33  
34  
35  
36  
37  
38  
39  
40  
41  
42  
43  
44  
45  
46  
47  
48  
49  
50  
51  
52  
53  
54  
55  
56  
57  
58  
59  
60

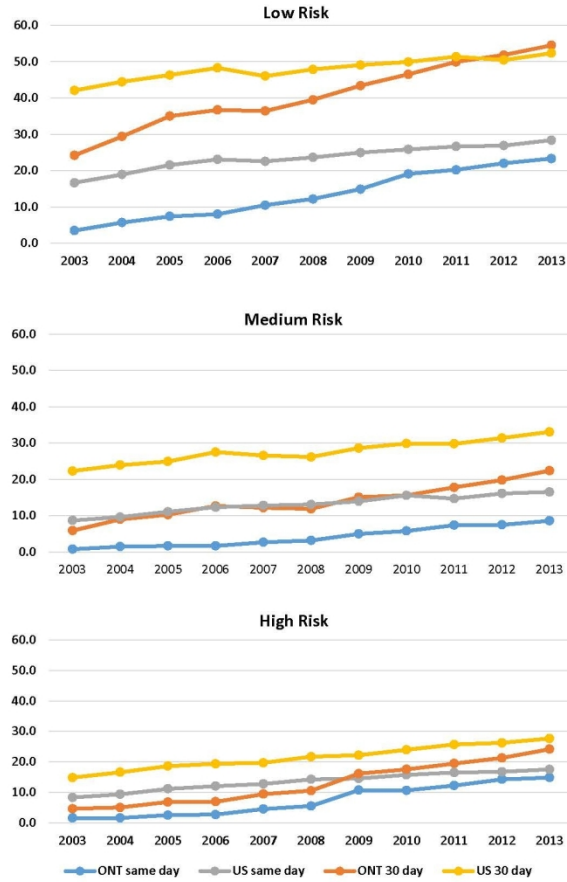

Figure 3 - PCI rates on day of admission and 30 days after AMI, by risk category  
215x279mm (200 x 200 DPI)

1  
2  
3  
4  
5  
6  
7  
8  
9  
10  
11  
12  
13  
14  
15  
16  
17  
18  
19  
20  
21  
22  
23  
24  
25  
26  
27  
28  
29  
30  
31  
32  
33  
34  
35  
36  
37  
38  
39  
40  
41  
42  
43  
44  
45  
46  
47  
48  
49  
50  
51  
52  
53  
54  
55  
56  
57  
58  
59  
60

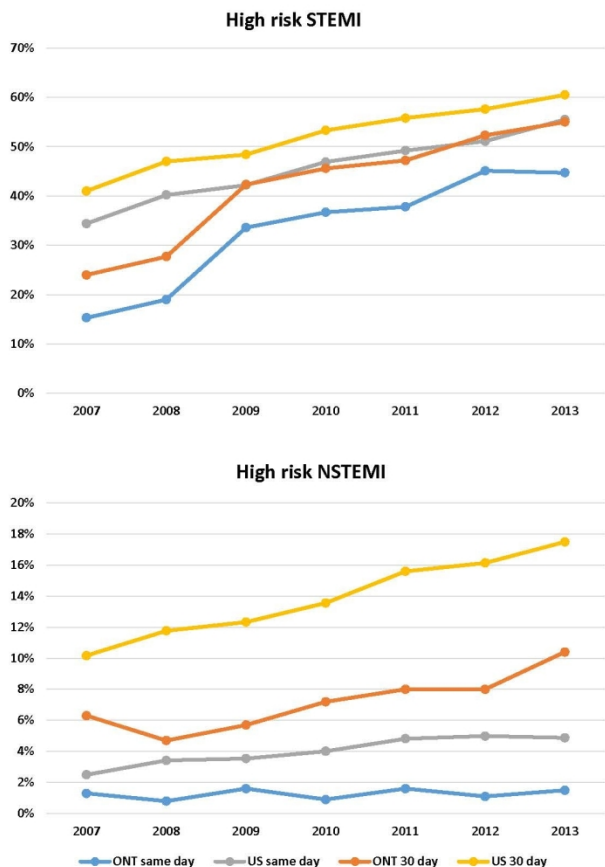

Figure 4 - PCI rates on day of admission and 30 days after AMI among high risk patients, by type of AMI  
215x279mm (200 x 200 DPI)



1  
2  
3  
4  
5  
6  
7  
8  
9  
10  
11  
12  
13  
14  
15  
16  
17  
18  
19  
20  
21  
22  
23  
24  
25  
26  
27  
28  
29  
30  
31  
32  
33  
34  
35  
36  
37  
38  
39  
40  
41  
42  
43  
44  
45  
46  
47  
48  
49  
50  
51  
52  
53  
54  
55  
56  
57  
58  
59  
60

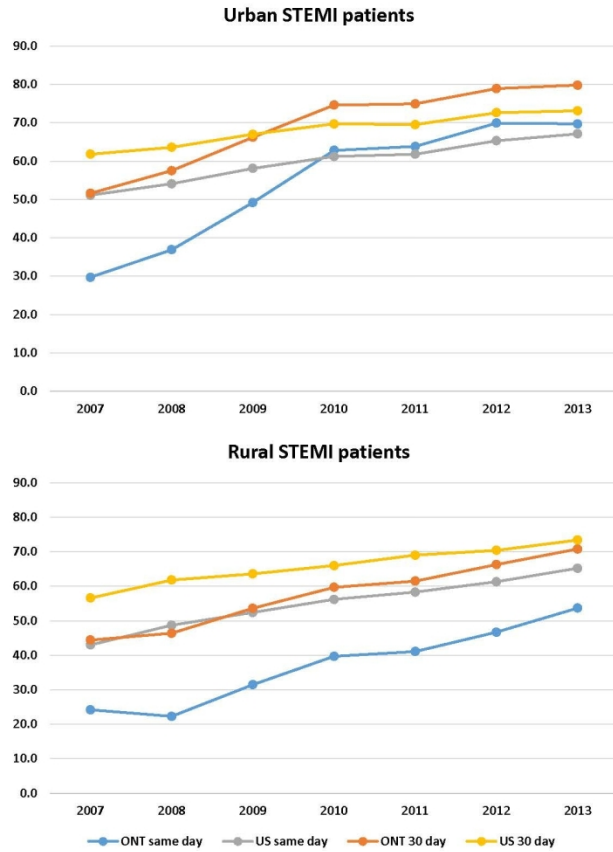

Figure 5 - PCI rates on day of admission and 30 days after AMI for rural and urban residents with STEMI in the US and Ontario

215x279mm (200 x 200 DPI)

**Appendix Table 1a: CPT codes used to identify cardiac catheterization procedures, US:**

| CPT code                    | Description                                                                                                                                                                                                                                                                                                                                                                                                                     |
|-----------------------------|---------------------------------------------------------------------------------------------------------------------------------------------------------------------------------------------------------------------------------------------------------------------------------------------------------------------------------------------------------------------------------------------------------------------------------|
| Procedure years before 2011 |                                                                                                                                                                                                                                                                                                                                                                                                                                 |
| 93508                       | Coronary Angiogram                                                                                                                                                                                                                                                                                                                                                                                                              |
| 93510                       | Left Heart Catheterization                                                                                                                                                                                                                                                                                                                                                                                                      |
| 93543                       | LV Injection                                                                                                                                                                                                                                                                                                                                                                                                                    |
| 93555                       | Supervision & Interpretation for LV angio                                                                                                                                                                                                                                                                                                                                                                                       |
| 93526                       | RLHC                                                                                                                                                                                                                                                                                                                                                                                                                            |
| 93545                       | Coronary Injection                                                                                                                                                                                                                                                                                                                                                                                                              |
| 93556                       | S&I Cor Ing                                                                                                                                                                                                                                                                                                                                                                                                                     |
| 93539                       | Injection Arterial Conduits                                                                                                                                                                                                                                                                                                                                                                                                     |
| 93540                       | Injection SVG's                                                                                                                                                                                                                                                                                                                                                                                                                 |
| Procedure years after 2011  |                                                                                                                                                                                                                                                                                                                                                                                                                                 |
| 93452                       | Left heart catheterization including intraprocedural injection(s) for left ventriculography; imaging supervision and interpretation, when performed                                                                                                                                                                                                                                                                             |
| 93453                       | Combined right heart cath and left heart catheterization including intraprocedural injection(s) for left ventriculography, imaging supervision and interpretation, when performed                                                                                                                                                                                                                                               |
| 93454                       | Catheter placement in coronary artery(s) for coronary angiography, including intraprocedural injection(s) for coronary angiography, imaging supervision and interpretation                                                                                                                                                                                                                                                      |
| 93455                       | Catheter placement in coronary artery(s) for coronary angiography, including intraprocedural injection(s) for coronary angiography, imaging supervision and interpretation; with catheter placement(s) in bypass graft(s) (internal mammary, free arterial venous grafts) including intraprocedural injection(s) for bypass graft angiography                                                                                   |
| 93456                       | Catheter placement in coronary artery(s) for coronary angiography, including intraprocedural injection(s) for coronary angiography, imaging supervision and interpretation; with right heart catheterization                                                                                                                                                                                                                    |
| 93457                       | Catheter placement in coronary artery(s) for coronary angiography, including intraprocedural injection(s) for coronary angiography, imaging supervision and interpretation; with catheter placement(s) in bypass graft(s) (internal mammary, free arterial, venous grafts) including intraprocedural injection(s) for bypass graft angiography and right heart catheterization                                                  |
| 93458                       | Catheter placement in coronary artery(s) for coronary angiography, including intraprocedural injection(s) for coronary angiography, imaging supervision and interpretation; with left heart catheterization including intraprocedural injection(s) for left ventriculography, when performed                                                                                                                                    |
| 93459                       | Catheter placement in coronary artery(s) for coronary angiography, including intraprocedural injection(s) for coronary angiography, imaging supervision and interpretation; with left heart catheterization including intraprocedural injection(s) for left ventriculography, when performed, catheter placement(s) in bypass graft(s) (internal mammary, free arterial, venous grafts) with bypass graft angiography           |
| 93460                       | Catheter placement in coronary artery(s) for coronary angiography, including intraprocedural injection(s) for coronary angiography, imaging supervision and interpretation; with right and left heart catheterization including intraprocedural injection(s) for left ventriculography, when performed                                                                                                                          |
| 93461                       | Catheter placement in coronary artery(s) for coronary angiography, including intraprocedural injection(s) for coronary angiography, imaging supervision and interpretation; with right and left heart catheterization including intraprocedural injection(s) for left ventriculography, when performed, catheter placement(s) in bypass graft(s) (internal mammary, free arterial, venous grafts) with bypass graft angiography |

**Appendix Table 1b: CPT codes used to identify PCI, US:**

| <b>CPT code</b>                                            | <b>Description</b>                                                                              |
|------------------------------------------------------------|-------------------------------------------------------------------------------------------------|
| <b>Procedure years before 2013:</b>                        |                                                                                                 |
| Nonstent and stent procedures combined for all statistics: |                                                                                                 |
| Nonstent                                                   |                                                                                                 |
| 92982                                                      | Angioplasty, initial vessel                                                                     |
| 92984                                                      | Angioplasty, each additional vessel                                                             |
| 92995                                                      | Atherectomy, initial vessel                                                                     |
| 92996                                                      | Atherectomy, each additional vessel                                                             |
| Stent:                                                     |                                                                                                 |
| 92980                                                      | Stent placement, initial vessel                                                                 |
| 92981                                                      | Stent placement, each additional vessel                                                         |
| C1874                                                      | Stent, Coated/Covered, With Delivery System                                                     |
| C1875                                                      | Stent, Coated/Covered, Without Delivery System                                                  |
| G0290                                                      | Drug eluting stent, initial vessel                                                              |
| G0291                                                      | Drug eluting stent, each additional vessel                                                      |
| <b>Procedure year after 2013:</b>                          |                                                                                                 |
| nonstent:                                                  |                                                                                                 |
| 92920                                                      | Angioplasty, single artery or branch                                                            |
| 92921                                                      | Angioplasty, each additional                                                                    |
| 92924                                                      | Atherectomy, single artery or branch                                                            |
| 92925                                                      | Atherectomy, each additional                                                                    |
| stent:                                                     |                                                                                                 |
| 92928/C9600                                                | Stent placement, single artery or branch                                                        |
| 92929/C9601                                                | Stent placement, each additional                                                                |
| 92933/C9602                                                | Atherectomy with stent, single artery or branch                                                 |
| 92934/C9603                                                | Atherectomy with stent, each additional                                                         |
| grafts, acute occlusion, and CTO                           |                                                                                                 |
| 92937/C9604                                                | Graft revascularization, single vessel                                                          |
| 92938/C9605                                                | Graft revascularization, each additional branch                                                 |
| 92941/C9606                                                | Revascularization of acute total/subtotal occlusion during myocardial infarction, single vessel |
| 92943/C9607                                                | Revascularization of CTO, single vessel, native coronary artery, branch or bypass graft         |
| 92944/C9608                                                | Revascularization of CTO, each additional native coronary artery, branch or bypass graft        |

**Appendix Table 1c: ICD-9 procedure codes used to identify CABG procedure, US:**

| <b>ICD-9</b> | <b>Description</b>                                                        |
|--------------|---------------------------------------------------------------------------|
| 361          | Bypass anastomosis for heart revascularization                            |
| 3610         | Aortocoronary bypass for heart revascularization, not otherwise specified |
| 3611         | (Aorto)coronary bypass of one coronary artery                             |
| 3612         | (Aorto)coronary bypass of two coronary arteries                           |
| 3613         | (Aorto)coronary bypass of three coronary arteries                         |
| 3614         | (Aorto)coronary bypass of four or more coronary arteries                  |
| 3615         | Single internal mammary-coronary artery bypass                            |
| 3616         | Double internal mammary-coronary artery bypass                            |
| 3617         | Abdominal - coronary artery bypass                                        |
| 3619         | Other bypass anastomosis for heart revascularization                      |

**Appendix Table 2: Procedure Codes used in Ontario claims:**

| CCI                            | Description                        | Fee code | Description                                                |
|--------------------------------|------------------------------------|----------|------------------------------------------------------------|
| <b>CABG</b>                    |                                    |          |                                                            |
| 11J76                          | BYPASS, CORONARY ARTERIES          | R742     | HEART PERI.-CORONARY ARTERY REPAIR-SINGLE                  |
| 11J80                          | REPAIR, CORONARY ARTERIES          | R743     | HEART PERI.-CORONARY ARTERY REPAIR-DOUBLE                  |
| <b>PCI</b>                     |                                    |          |                                                            |
| 11J50                          | DILATION, CORONARY ARTERIES        | Z434     | ANGIOGRAPHY-TRANSLUMINAL CORONARY ANGIOPLASTY              |
|                                |                                    | G298     | CORONARY ANGIOPLAST STENT                                  |
| <b>Cardiac Catheterization</b> |                                    |          |                                                            |
| 31P10                          | Xray, heart with coronary arteries | Z442     | D&TPROC.-CARDIOVASC.SELECTCORONARY CATHERIZ'N INC'L INJ.   |
|                                |                                    | Z440     | HAEMODYNAMIC/FLOW/METABOLIC STUDIES LT.HEART RETROG.AORT   |
|                                |                                    | G297     | D./T.PROC.CARDIAC CATH.-ANGIOGRAMS ONLY2 1 RT.HEART 1 LEFT |

**Appendix Table 3: Overall rates of procedures at 3 days after index AMI admission, US and Ontario**

|      | US PCI | ONT PCI | US cath | ONT cath | US CABG | ONT CABG |
|------|--------|---------|---------|----------|---------|----------|
| 2003 | 25.4   | 5.2     | 46.5    | 11.9     | 5.0     | 0.4      |
| 2004 | 27.5   | 7.8     | 48.8    | 16.1     | 5.1     | 0.4      |
| 2005 | 29.3   | 10.5    | 50.3    | 20.4     | 4.9     | 0.6      |
| 2006 | 31.0   | 11.9    | 52.2    | 23.8     | 5.1     | 0.4      |
| 2007 | 30.3   | 16.2    | 51.9    | 30.5     | 5.0     | 0.5      |
| 2008 | 31.1   | 19.1    | 52.3    | 34.3     | 4.3     | 0.5      |
| 2009 | 32.8   | 23.2    | 54.6    | 39.2     | 4.5     | 0.5      |
| 2010 | 33.8   | 26.3    | 56.0    | 42.2     | 4.4     | 0.8      |
| 2011 | 34.9   | 29      | 56.7    | 45.5     | 4.0     | 0.6      |
| 2012 | 35.5   | 31.4    | 56.9    | 47.6     | 4.0     | 0.6      |
| 2013 | 36.1   | 34.6    | 57.1    | 51.8     | 4.0     | 0.6      |

Numbers represent Kaplan-Meier rate estimates, censoring for death and for entry into a managed care Medicare plan (US patients only).

**Appendix Table 4: Rates of PCI at 3 days after index AMI admission, by predicted risk and AMI type, US and Ontario**

|      | Ontario           |        |      | United States     |        |      |
|------|-------------------|--------|------|-------------------|--------|------|
|      | By AMI type       |        |      | By AMI type       |        |      |
|      | STEMI             | NSTEMI |      | STEMI             | NSTEMI |      |
| 2007 | 41.1              | 11.6   |      | 57.2              | 21.4   |      |
| 2008 | 44.4              | 11.8   |      | 60.4              | 22.4   |      |
| 2009 | 55.0              | 13.0   |      | 63.8              | 24.0   |      |
| 2010 | 64.3              | 14.2   |      | 66.4              | 24.8   |      |
| 2011 | 66.0              | 16.3   |      | 67.3              | 26.6   |      |
| 2012 | 70.8              | 18.5   |      | 70.1              | 26.8   |      |
| 2013 | 73.2              | 21.3   |      | 71.5              | 27.3   |      |
|      | By predicted risk |        |      | By predicted risk |        |      |
|      | Low               | Medium | High | Low               | Medium | High |
| 2003 | 8.4               | 1.7    | 2.6  | 35.5              | 17.1   | 12.2 |
| 2004 | 12.5              | 3.3    | 2.8  | 38.4              | 18.7   | 13.7 |
| 2005 | 17.5              | 3.8    | 3.9  | 40.8              | 20.2   | 15.9 |
| 2006 | 19.5              | 4.5    | 4.3  | 42.8              | 22.6   | 16.8 |
| 2007 | 23.8              | 6.7    | 6.6  | 41.7              | 22.1   | 17.0 |
| 2008 | 27.0              | 6.4    | 7.5  | 43.4              | 22.0   | 18.9 |
| 2009 | 30.0              | 9.3    | 14.0 | 44.8              | 24.3   | 19.6 |
| 2010 | 34.8              | 9.7    | 13.4 | 46.0              | 25.6   | 21.2 |
| 2011 | 37.9              | 11.6   | 15.1 | 47.4              | 25.7   | 22.4 |
| 2012 | 40.4              | 12.7   | 17.7 | 46.7              | 27.3   | 23.5 |
| 2013 | 43.6              | 15.4   | 19.0 | 47.3              | 27.6   | 24.0 |

Numbers represent Kaplan-Meier rate estimates, censoring for death and for entry into a managed care Medicare plan (US patients only).
